# Supplementary material
Source: PubMed Central journal article supplement (PMC10251749)
Supplement: NIHMS1902022-supplement-Supporting_Information.pdf [file NIHMS1902022-supplement-Supporting_Information.pdf]

# ***In vivo* photopharmacology enabled by multifunctional fibers**

James A. Frank<sup>§\*1,2,3</sup>, Marc-Joseph Antonini<sup>§1,2,4</sup>, Po-Han Chiang<sup>1,5</sup>, Andres Canales<sup>1,6</sup>, David B. Konrad<sup>7</sup>, Indie Garwood<sup>1,2,4</sup>, Gabriela Rajic<sup>3</sup>, Florian Koehler<sup>1,8</sup>, Yoel Fink<sup>1,6</sup>,  
Polina Anikeeva<sup>\*1,2,6</sup>

<sup>1</sup>Research Laboratory of Electronics, Massachusetts Institute of Technology, Cambridge, MA, USA

<sup>2</sup>McGovern Institute for Brain Research, Massachusetts Institute of Technology, Cambridge, MA, USA

<sup>3</sup>Vollum Institute, Oregon Health & Science University, Portland, OR, USA

<sup>4</sup>Harvard/MIT Health Science & Technology Graduate Program, Cambridge, MA, USA

<sup>5</sup>Institute of Biomedical Engineering, National Chiao Tung University, Hsinchu, Taiwan (R.O.C.)

<sup>6</sup>Department of Material Science and Engineering, Massachusetts Institute of Technology, Cambridge, MA, USA

<sup>7</sup>Department of Pharmacy, Ludwig Maximilian University, Munich, Germany

<sup>8</sup>Department of Electrical Engineering and Computer Science, Massachusetts Institute of Technology, Cambridge, MA, USA

§ These authors contributed equally to this work.

\* All questions and requests for samples should be addressed to: [anikeeva@mit.edu](mailto:anikeeva@mit.edu),  
[frankja@ohsu.edu](mailto:frankja@ohsu.edu)

## **SUPPORTING INFORMATION**

## SUPPORTING FIGURES

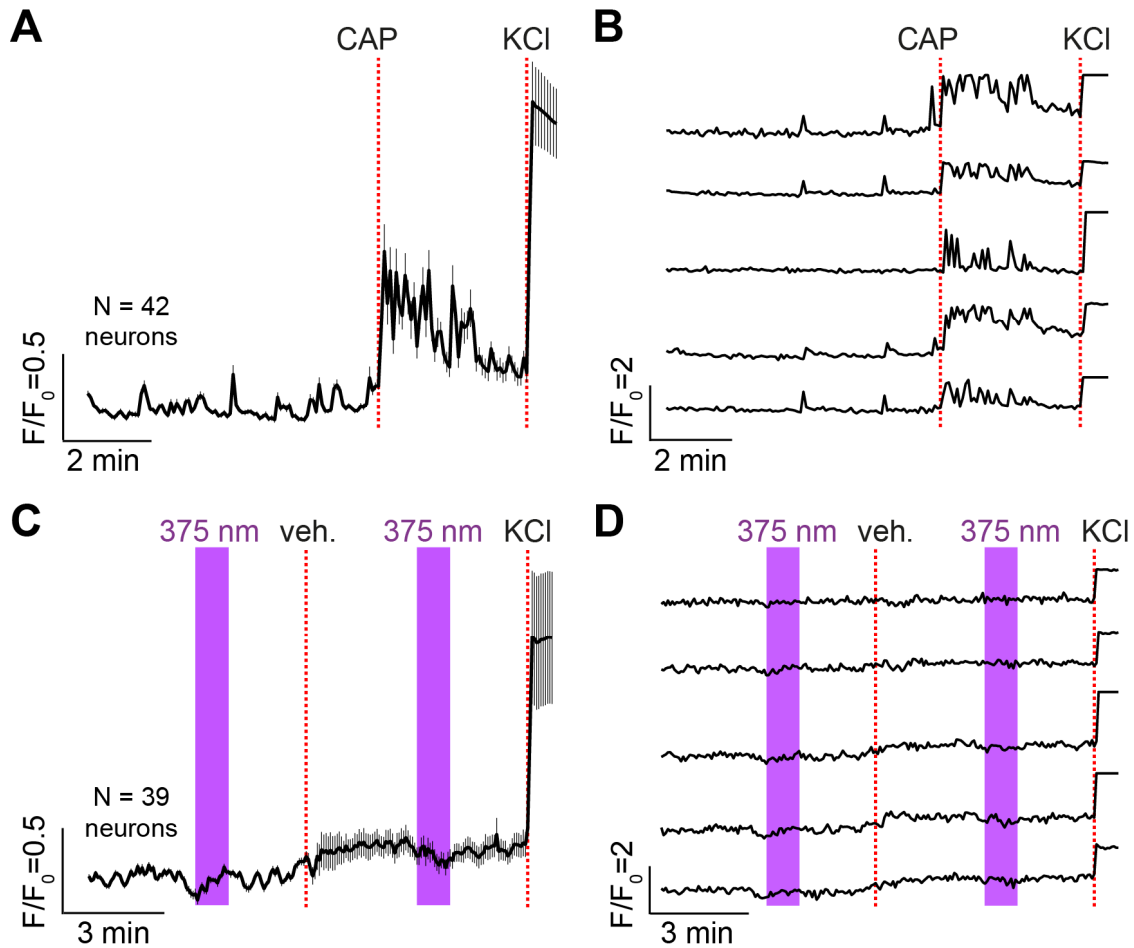

**Figure S1. *red-AzCA* vehicle control experiments in cultured neurons.** Fluo-4 fluorescence was recorded in cultured rat hippocampal neurons that had been transduced with LentiCaMKII $\alpha$ ::TRPV1-p2A-mCherry virus. (**A,B**) CAP addition (20 nM) increased intracellular Ca<sup>2+</sup> levels. Displayed as (**A**) the average normalized fluorescence level (N = 42 neurons from 2 experiments) and (**B**) 5 traces from representative neurons (**C,D**) Addition of a vehicle control (0.1% DMSO, addn.) did not affect Ca<sup>2+</sup> levels before or after 375 nm irradiation. KCl (25 mM) addition still increased Ca<sup>2+</sup> levels. Displayed as (**C**) the average normalized fluorescence level (N = 39 neurons from 2 experiments) and (**D**) 5 traces from representative neurons. Error bars = mean  $\pm$  S.E.M.

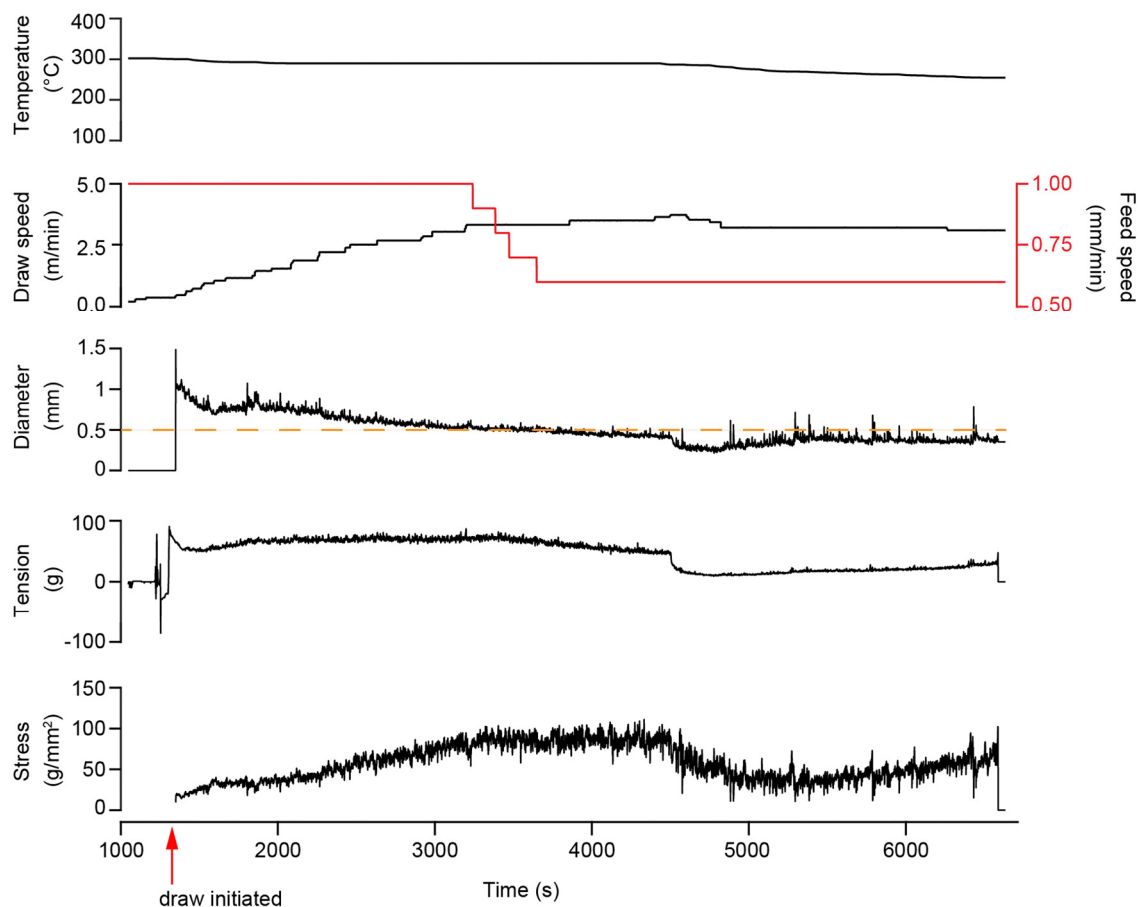

**Figure S2. Drawing parameters and the thermal drawing process.** The thermal drawing process was utilized to draw the macroscopic preform into a microscopic fiber. Displayed are the oven temperature, the draw/feed speeds, the final fiber diameter, and the resulting tension and stress values. The fiber used in this study was taken between  $t = 5000\text{-}6000$  s.

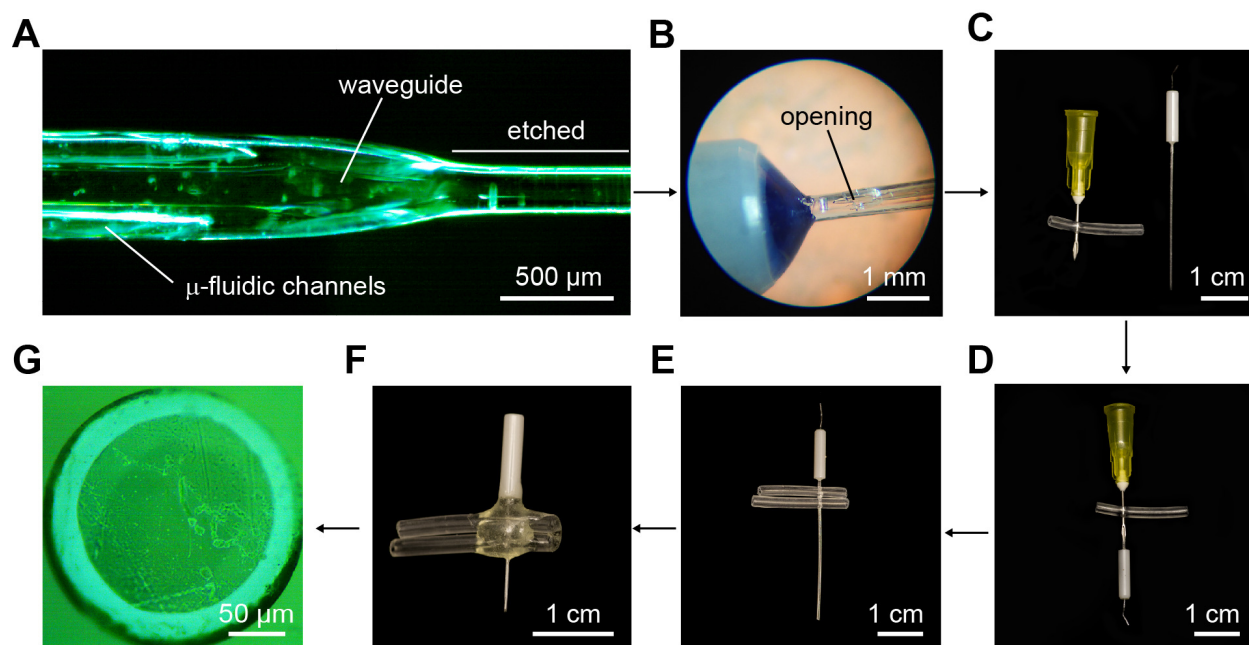

**Figure S3. Fiber connectorization process.** (A) One end of the fiber tip was etched in dichloromethane for insertion into the optical ferrule. (B) After gluing into an optical ferrule, the microfluidic channels were manually opened just below the ferrule. (C,D) A piece of tubing was pierced with a needle, through which the fiber was inserted to slide into the tubing. (E) Two pieces of tubing were positioned above the hole for each microfluidic channel. (F) The tubing and fiber were sealed with epoxy and (G) the ferrule was polished to afford a fully connectorized device (as shown in Figure 1C).

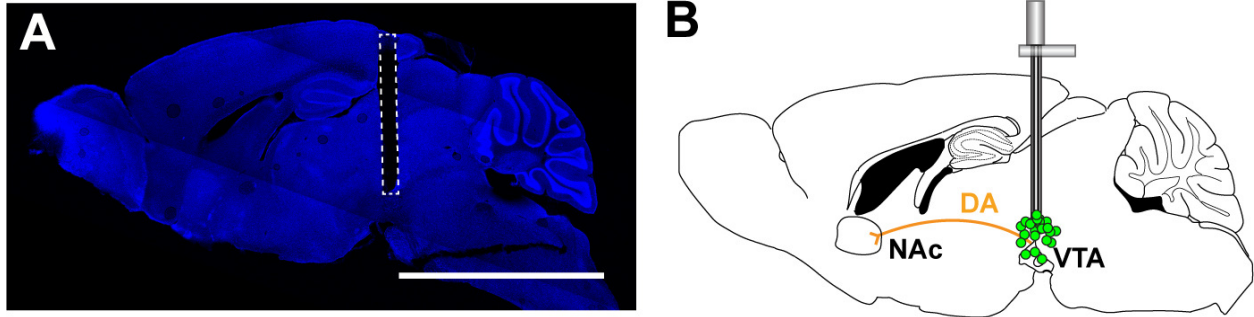

**Figure S4. Implantation locations.** (A) A representative mosaic fluorescence micrograph of a mouse sagittal brain slice (ML = 0.5 mm, 60  $\mu$ m thick) stained with DAPI. The fiber implantation location in the VTA is depicted by the dotted line. Scale bar = 5 mm. (B) Schematic of all injection positions for the c-Fos immunofluorescence experiments, depicted as colored dots.

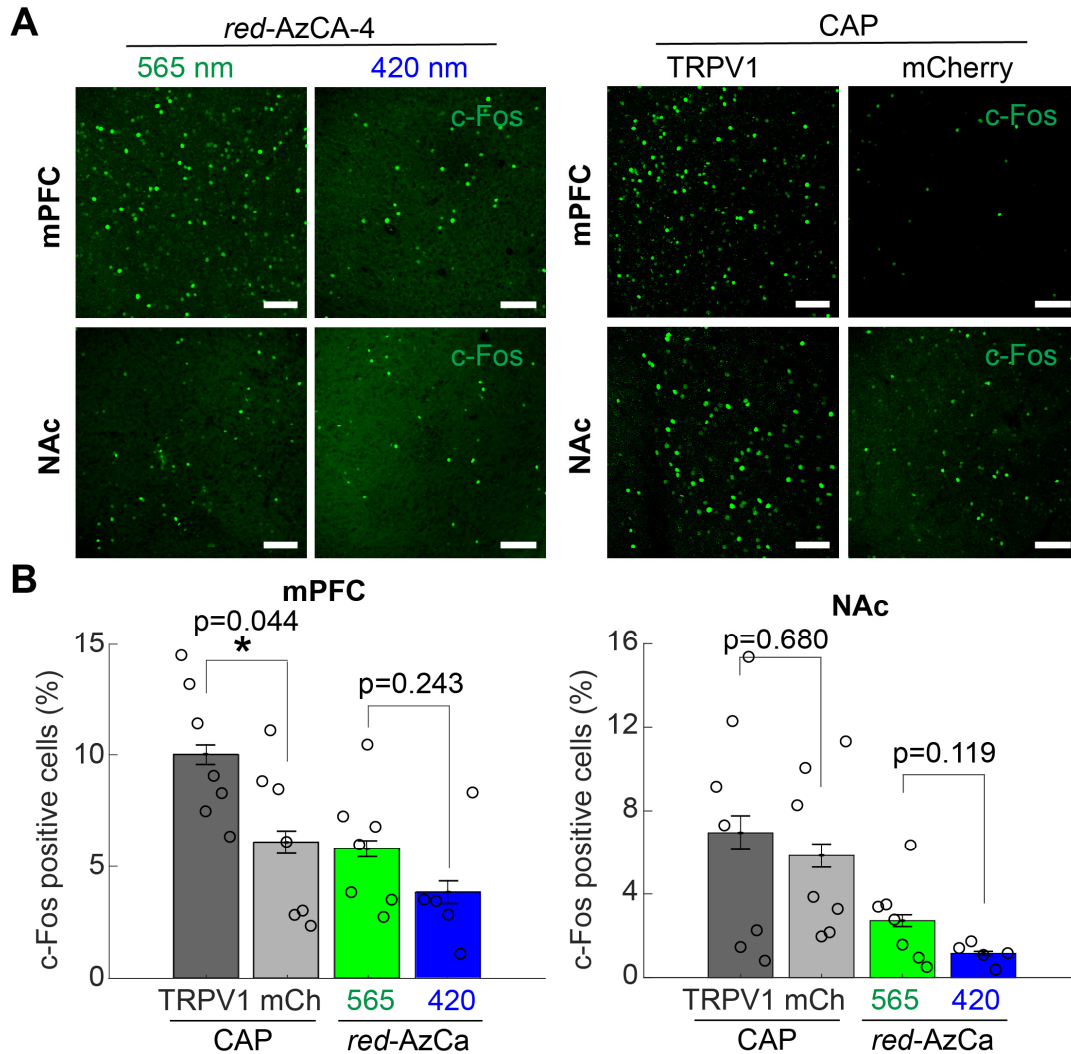

**Figure S5. Chemogenetic control of VTA projections.** *Red-AzCA-4* (3  $\mu$ L, 1  $\mu$ M) and CAP (3  $\mu$ L, 10  $\mu$ M) injection in anesthetized mice increased c-Fos expression in the NAc and mPFC. For *red-AzCA-4*, c-Fos was further upregulated in the presence of green (565 nm) light (N=7) compared to blue (420 nm) light (N=5). Similarly, CAP injection into mice expressing TRPV1 (N=7) upregulated c-Fos expression compared to control mice expressing mCherry only (N=7). Displayed as (A) representative images from fixed VTA slices, and (B) a quantification of the % c-Fos positive cells from multiple animals. Scale bars = 100  $\mu$ m. Error bars = mean  $\pm$  S.E.M.

**Table S1: Corresponding primary and secondary antibodies for immunohistochemistry**

| <b>Protein Target</b> | <b>Primary Antibody</b>                                                                                       | <b>Secondary Antibody</b>                                                                                                                     |
|-----------------------|---------------------------------------------------------------------------------------------------------------|-----------------------------------------------------------------------------------------------------------------------------------------------|
| NeuN                  | Anti-NeuN Rabbit mAb; Abcam, #ab177487, lot #: GR3250076-4; 1:300 dilution                                    | Donkey anti-Rabbit IgG (H+L) Highly Cross-Adsorbed Secondary Antibody, Alexa Fluor 488; Invitrogen, #A-21206, lot #: 2045215; 1:1000 dilution |
| c-Fos                 | Anti-c-Fos (9F6) Rabbit mAb; Cell Signaling Technology, #2250s, lot #: [Ref: 09/2019 Lot:10]; 1:1000 dilution | Donkey anti-Rabbit IgG (H+L) Highly Cross-Adsorbed Secondary Antibody, Alexa Fluor 488; Invitrogen, #A-21206, lot #: 1927937; 1:2000 dilution |
| TRPV1                 | Anti-Capsaicin Receptor Antibody, NT; Chemicon®, AB5889, lot #: 3022017; 1:1000 dilution                      | Donkey anti-Rabbit IgG (H+L) Highly Cross-Adsorbed Secondary Antibody, Alexa Fluor 488; Invitrogen, #A-21206; 1:2000 dilution                 |
